# Supplementary material
Source: publisher figshare collection journal article supplement (https://sage.figshare.com/ndownloader/files/17922413)
Supplement: Supplementary file 1 [file 17922413]

Reviewer 2 v.2

Comments to the Author

I reviewed the revisions of the manuscript. From my view there are no further problems and it should be published.
